# Supplementary material for: 6-Gingerol, a Major Constituent of Zingiber officinale Rhizoma, Exerts Anticonvulsant Activity in the Pentylenetetrazole-Induced Seizure Model in Larval Zebrafish
Source: MDPI journal article supplement (doi:10.3390/ijms22147745), 2021-07-20

# SUPPLEMENTARY FILE

## 6-Gingerol, a Major Constituent of *Zingiber officinale* Rhizoma and Exerts Anticonvulsant Activity in the Pentylentetrazole-Induced Seizure Model in Larval Zebrafish

Kinga Gawel <sup>1,2,\*</sup>, Wirginia Kukula-Koch <sup>3</sup>, Nancy Saana Banono <sup>1,†</sup>, Dorota Nieoczym <sup>4,†</sup>, Katarzyna Targowska-Duda <sup>5</sup>, Lidia Czernicka <sup>6</sup>, Jolanta Parada-Turska <sup>7</sup> and Camila V. Esguerra <sup>1</sup>

**Figure S1.** Determination of A) serotonin, and B) dopamine in 7 days old zebrafish larvae by HPLC-MS. After 24-h incubation in 6-GIN (37.5  $\mu$ M), zebrafish larvae were exposed to acute dose of PTZ (20 mM) for 90 min. Next, whole zebrafish larvae were collected in a pool of n=100/sample. Data were analyzed using one-way ANOVA followed by the Tukey's *post-hoc* test. Data are depicted as mean  $\pm$  SEM. Veh + veh (*n* = 9), 6-GIN 37.5 + Veh (*n* = 5), Veh + PTZ (*n* = 5), 6-GIN 37.5 + PTZ (*n* = 5). &&& *P*<0.001, && *P*<0.01, vs. Veh + PTZ. 5-HT- serotonin, 6-GIN – 6- gingerol, DA- dopamine, PTZ – pentylentetrazole, Veh – vehicle. n- refers to total number of larvae.

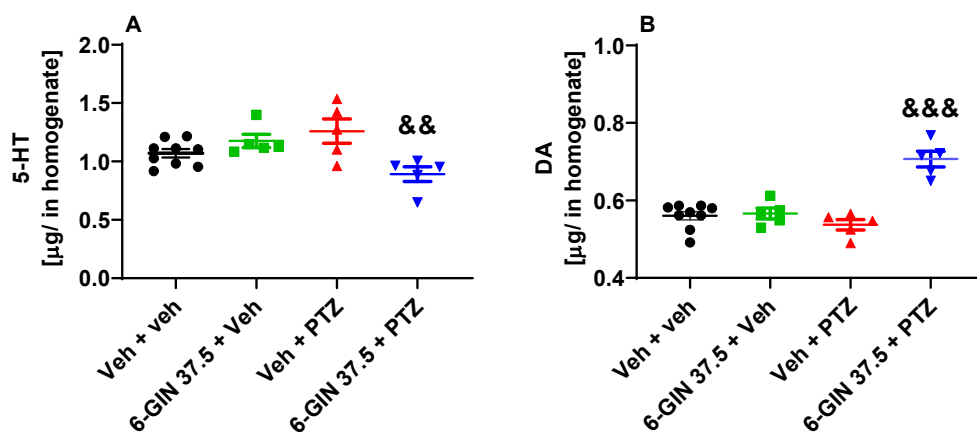

**Figure S2.** The total ion chromatogram (A) of the water:acetonitrile extract from zebrafish larvae with extracted ion chromatograms of serotonin and dopamine in 7 days old zebrafish larvae by HPLC-MS.

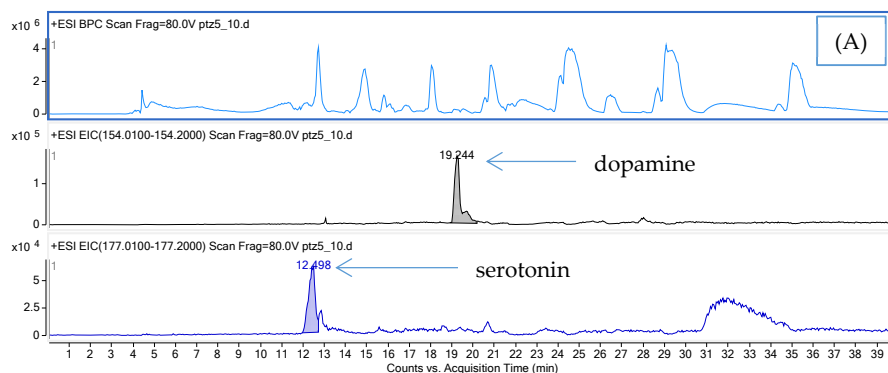

Supplement: s1 [file s1]
